# Supplementary material for: The 2020 Mw 6.6 Vernadsky transform earthquake sequence: rupture and Coulomb stress changes surrounding an oceanic core complex
Source: Springer Nature journal article supplement (doi:10.1007/s11001-024-09558-z), 2024-11-25
Supplement: MOESM2 [file 11001_2024_9558_MOESM2_ESM.docx]

**Table S1**

**Layers Depth (km) P-wave (km/s) S-wave (km/s)**

| 1 | 0.00 | 1.750 | 0.340 |
| --- | --- | --- | --- |
| 2 | 0.16 | 5.000 | 2.700 |
| 3 | 0.83 | 6.500 | 3.700 |
| 4 | 2.30 | 7.100 | 4.050 |
| 5 | 6.87 | 8.040 | 4.470 |

**Table S2**

**Event Date Time Lat ERLT Long ERLN RMS mb**

**(MM DD, YYYY) (HH:MM:SS) (°) (km) (°) (km) (s)**

| 1 | Sep 6, 2020 | 06:51:15 | 7.731 05 | -37.104 05 | 1.8 | 6.6 |
| --- | --- | --- | --- | --- | --- | --- |
| 2 | Sep 6, 2020 | 07:07:55 | 7.708 14 | -37.096 14 | 0.4 | 4.1 |
| 3 | Sep 6, 2020 | 07:12:34 | 7.803 05 | -37.051 05 | 0.6 | 3.9 |
| 4 | Sep 6, 2020 | 07:12:54 | 7.841 15 | -37.014 15 | 1.6 | 4.0 |
| 5 | Sep 6, 2020 | 07:17:46 | 7.726 01 | -37.017 01 | 0.7 | 3.8 |
| 6 | Sep 6, 2020 | 07:26:35 | 7.802 15 | -36.867 15 | 1.2 | 4.1 |
| 7 | Sep 6, 2020 | 07:30:40 | 7.802 12 | -37.059 12 | 0.2 | 3.8 |
| 8 | Sep 6, 2020 | 07:42:53 | 7.727 05 | -36.981 05 | 0.1 | 3.9 |
| 9 | Sep 6, 2020 | 07:48:33 | 7.754 12 | -37.026 12 | 0.2 | 3.9 |
| 10 | Sep 6, 2020 | 07:54:20 | 7.742 04 | -37.010 04 | 0.1 | 3.8 |
| 11 | Sep 6, 2020 | 07:58:46 | 7.741 18 | -37.003 18 | 0.3 | 3.9 |
| 12 | Sep 6, 2020 | 08:01:12 | 7.966 10 | -37.065 10 | 0.2 | 4.2 |
| 13 | Sep 6, 2020 | 08:04:54 | 7.796 09 | -37.072 09 | 0.2 | 3.8 |
| 14 | Sep 6, 2020 | 08:08:40 | 7.762 09 | -37.010 09 | 0.2 | 3.8 |
| 15 | Sep 6, 2020 | 08:14:03 | 7.822 05 | -36.962 05 | 0.1 | 4.0 |
| 16 | Sep 6, 2020 | 08:24:15 | 7.849 08 | -37.106 08 | 0.1 | 3.9 |
| 17 | Sep 6, 2020 | 08:29:48 | 7.850 14 | -37.016 14 | 0.8 | 4.7 |
| 18 | Sep 6, 2020 | 08:35:10 | 7.732 09 | -36.956 09 | 0.2 | 3.8 |
| 19 | Sep 6, 2020 | 08:35:42 | 7.737 07 | -36.934 07 | 0.1 | 3.8 |
| 20 | Sep 6, 2020 | 08:50:18 | 7.810 16 | -37.050 16 | 0.1 | 3.8 |
| 21 | Sep 6, 2020 | 09:12:58 | 7.885 10 | -37.098 10 | 1.1 | 3.9 |
| 22 | Sep 6, 2020 | 09:19:29 | 7.963 08 | -37.082 08 | 1.3 | 4.0 |
| 23 | Sep 6, 2020 | 09:30:39 | 7.811 20 | -37.082 20 | 1.2 | 3.8 |
| 24 | Sep 6, 2020 | 09:34:32 | 7.817 13 | -37.051 13 | 1.1 | 3.8 |
| 25 | Sep 6, 2020 | 09:48:24 | 7.756 18 | -36.949 18 | 0.2 | 3.8 |
| 26 | Sep 6, 2020 | 09:59:04 | 7.715 10 | -37.042 10 | 0.3 | 4.0 |
| 27 | Sep 6, 2020 | 10:07:54 | 7.887 11 | -37.098 11 | 0.5 | 3.9 |
| 28 | Sep 6, 2020 | 10:10:44 | 7.755 20 | -37.001 20 | 0.4 | 3.8 |
| 29 | Sep 6, 2020 | 10:16:56 | 7.748 04 | -36.849 04 | 0.1 | 4.1 |
| 30 | Sep 6, 2020 | 10:28:28 | 7.877 17 | -36.961 17 | 0.5 | 3.8 |
| 31 | Sep 6, 2020 | 10:36:18 | 7.699 11 | -37.074 11 | 0.2 | 3.8 |
| 32 | Sep 6, 2020 | 11:06:53 | 7.986 05 | -37.049 05 | 0.1 | 4.4 |
| 33 | Sep 6, 2020 | 11:20:18 | 7.803 05 | -37.086 05 | 0.1 | 3.9 |
| 34 | Sep 6, 2020 | 11:29:40 | 7.666 08 | -37.124 08 | 0.1 | 3.9 |
| 35 | Sep 6, 2020 | 11:30:24 | 7.784 05 | -37.053 05 | 0.1 | 3.8 |
| 36 | Sep 6, 2020 | 11:49:23 | 7.898 06 | -37.113 06 | 0.1 | 3.8 |
| 37 | Sep 6, 2020 | 12:00:02 | 7.875 05 | -36.936 05 | 0.1 | 4.0 |
| 38 | Sep 6, 2020 | 12:05:31 | 7.674 09 | -37.005 09 | 0.2 | 3.9 |
| 39 | Sep 6, 2020 | 12:16:52 | 7.951 07 | -37.054 07 | 0.1 | 4.2 |
| 40 | Sep 6, 2020 | 12:23:23 | 7.695 05 | -36.750 05 | 0.1 | 3.8 |
| 41 | Sep 6, 2020 | 12:25:18 | 7.912 07 | -36.938 07 | 0.1 | 4.0 |
| 42 | Sep 6, 2020 | 12:29:19 | 7.695 10 | -37.040 10 | 0.2 | 3.8 |
| 43 | Sep 6, 2020 | 12:59:43 | 7.780 08 | -36.887 08 | 0.1 | 3.9 |
| 44 | Sep 6, 2020 | 13:05:45 | 7.783 07 | -36.903 07 | 0.1 | 3.8 |
| 45 | Sep 6, 2020 | 13:19:03 | 7.836 04 | -37.030 04 | 0.1 | 4.2 |
| 46 | Sep 6, 2020 | 13:20:21 | 7.783 02 | -36.989 02 | 1.0 | 3.8 |
| 47 | Sep 6, 2020 | 13:43:37 | 7.794 09 | -36.986 09 | 0.2 | 3.8 |
| 48 | Sep 6, 2020 | 14:05:48 | 7.761 07 | -36.945 07 | 0.1 | 3.9 |
| 49 | Sep 6, 2020 | 14:18:36 | 7.820 03 | -36.988 03 | 0.1 | 4.1 |
| 50 | Sep 6, 2020 | 14:25:07 | 7.888 04 | -37.097 04 | 0.1 | 3.8 |
| 51 | Sep 6, 2020 | 14:46:12 | 7.758 04 | -37.045 04 | 0.1 | 3.9 |
| 52 | Sep 6, 2020 | 15:34:04 | 7.826 05 | -37.057 05 | 0.1 | 3.9 |
| 53 | Sep 6, 2020 | 15:35:14 | 7.691 18 | -36.929 18 | 0.4 | 3.8 |
| 54 | Sep 6, 2020 | 16:31:40 | 7.756 05 | -36.893 05 | 0.1 | 3.9 |
| 55 | Sep 6, 2020 | 16:45:00 | 7.742 13 | -37.014 13 | 0.4 | 3.8 |
| 56 | Sep 6, 2020 | 16:56:52 | 7.835 12 | -37.043 12 | 0.2 | 4.0 |
| 57 | Sep 6, 2020 | 17:36:23 | 7.777 11 | -37.048 11 | 0.2 | 3.9 |
| 58 | Sep 6, 2020 | 18:37:18 | 7.814 05 | -36.981 05 | 0.1 | 3.8 |
| 59 | Sep 6, 2020 | 18:41:44 | 7.833 06 | -37.054 06 | 0.1 | 3.8 |
| 60 | Sep 6, 2020 | 19:05:48 | 7.824 13 | -37.015 13 | 0.2 | 4.1 |
| 61 | Sep 6, 2020 | 20:36:34 | 7.769 06 | -36.913 06 | 0.1 | 4.0 |
| 62 | Sep 6, 2020 | 21:19:39 | 7.779 16 | -36.991 16 | 0.3 | 3.8 |
| 63 | Sep 6, 2020 | 21:39:33 | 7.796 05 | -37.048 05 | 1.5 | 4.4 |
| 64 | Sep 6, 2020 | 22:25:31 | 7.771 11 | -36.419 11 | 0.2 | 3.9 |
| 65 | Sep 6, 2020 | 22:40:48 | 7.812 05 | -36.845 05 | 0.1 | 4.0 |
| 66 | Sep 6, 2020 | 22:46:12 | 7.766 11 | -37.074 11 | 0.2 | 4.1 |
| 67 | Sep 6, 2020 | 23:08:43 | 7.779 05 | -37.021 05 | 0.1 | 3.9 |
| 68 | Sep 6, 2020 | 23:19:08 | 7.790 08 | -37.038 08 | 0.1 | 4.2 |
| 69 | Sep 6, 2020 | 23:47:52 | 7.816 04 | -36.941 04 | 0.1 | 3.8 |
| 70 | Sep 6, 2020 | 23:57:30 | 7.825 05 | -37.037 05 | 0.1 | 4.0 |
| 71 | Sep 7, 2020 | 00:46:32 | 7.811 05 | -37.024 05 | 0.1 | 3.9 |
| 72 | Sep 7, 2020 | 01:01:22 | 7.752 03 | -37.008 03 | 0.2 | 3.8 |
| 73 | Sep 7, 2020 | 02:03:23 | 7.767 05 | -37.027 05 | 0.1 | 3.8 |
| 74 | Sep 7, 2020 | 02:08:08 | 7.745 07 | -37.036 07 | 0.1 | 3.8 |
| 75 | Sep 7, 2020 | 02:29:24 | 7.770 10 | -36.932 10 | 0.2 | 3.8 |
| 76 | Sep 7, 2020 | 02:43:05 | 7.738 09 | -37.011 09 | 0.2 | 4.2 |
| 77 | Sep 7, 2020 | 03:06:45 | 7.756 08 | -36.978 08 | 0.1 | 4.2 |
| 78 | Sep 7, 2020 | 03:21:00 | 7.776 04 | -36.944 04 | 0.1 | 3.9 |
| 79 | Sep 7, 2020 | 03:31:38 | 7.781 08 | -37.028 08 | 0.1 | 3.9 |
| 80 | Sep 7, 2020 | 03:32:42 | 7.717 10 | -37.005 10 | 0.3 | 3.8 |
| 81 | Sep 7, 2020 | 03:36:58 | 7.775 10 | -37.019 10 | 0.1 | 3.9 |
| 82 | Sep 7, 2020 | 03:37:45 | 7.795 10 | -37.022 10 | 0.3 | 3.8 |
| 83 | Sep 7, 2020 | 04:30:40 | 7.728 08 | -37.014 08 | 0.1 | 4.0 |
| 84 | Sep 7, 2020 | 04:40:30 | 7.766 10 | -37.025 10 | 0.1 | 3.8 |
| 85 | Sep 7, 2020 | 04:45:20 | 7.747 09 | -37.047 09 | 0.2 | 4.2 |
| 86 | Sep 7, 2020 | 04:58:03 | 7.738 07 | -37.107 07 | 0.1 | 3.9 |
| 87 | Sep 7, 2020 | 06:07:13 | 7.746 10 | -37.030 10 | 0.2 | 4.1 |
| 88 | Sep 7, 2020 | 06:38:57 | 7.712 03 | -37.045 03 | 0.1 | 3.8 |
| 89 | Sep 7, 2020 | 07:18:52 | 7.769 01 | -37.020 01 | 0.2 | 3.9 |
| 90 | Sep 7, 2020 | 07:44:33 | 7.744 08 | -37.020 08 | 0.1 | 4.1 |
| 91 | Sep 7, 2020 | 08:06:12 | 7.727 10 | -37.032 10 | 0.1 | 3.9 |
| 92 | Sep 7, 2020 | 08:18:17 | 7.762 08 | -37.021 08 | 0.1 | 4.0 |
| 93 | Sep 7, 2020 | 08:50:12 | 7.760 09 | -37.019 09 | 0.2 | 4.2 |
| 94 | Sep 7, 2020 | 09:05:46 | 7.714 12 | -37.044 12 | 0.2 | 3.9 |
| 95 | Sep 7, 2020 | 09:11:08 | 7.740 10 | -37.011 10 | 0.1 | 3.8 |
| 96 | Sep 7, 2020 | 10:25:57 | 7.820 11 | -37.011 11 | 0.2 | 4.2 |
| 97 | Sep 7, 2020 | 10:38:49 | 7.747 08 | -37.072 08 | 0.1 | 3.9 |
| 98 | Sep 7, 2020 | 11:03:20 | 7.776 14 | -36.906 14 | 0.4 | 4.8 |
| 99 | Sep 7, 2020 | 11:19:59 | 7.749 10 | -36.925 10 | 0.3 | 4.1 |
| 100 | Sep 7, 2020 | 11:53:17 | 7.777 10 | -36.959 10 | 0.2 | 4.0 |
| 101 | Sep 7, 2020 | 12:15:49 | 7.735 10 | -37.026 10 | 0.1 | 3.8 |
| 102 | Sep 7, 2020 | 13:38:58 | 7.766 01 | -36.991 01 | 0.1 | 3.8 |
| 103 | Sep 7, 2020 | 18:13:35 | 7.816 10 | -37.058 10 | 0.1 | 4.0 |
| 104 | Sep 7, 2020 | 19:17:41 | 7.750 10 | -36.894 10 | 0.1 | 3.9 |
| 105 | Sep 7, 2020 | 21:15:10 | 7.825 10 | -36.976 10 | 0.2 | 4.1 |
| 106 | Sep 7, 2020 | 21:19:05 | 7.790 10 | -37.050 10 | 0.2 | 4.3 |
| 107 | Sep 7, 2020 | 21:22:46 | 7.729 05 | -36.956 05 | 0.1 | 4.6 |
| 108 | Sep 8, 2020 | 00:28:30 | 7.762 03 | -37.035 03 | 0.1 | 3.8 |
| 109 | Sep 8, 2020 | 00:47:37 | 7.751 03 | -37.029 03 | 0.1 | 3.9 |
| 110 | Sep 8, 2020 | 03:29:35 | 7.772 10 | -37.033 10 | 0.1 | 3.9 |
| 111 | Sep 8, 2020 | 04:02:25 | 7.759 10 | -37.016 10 | 1.0 | 4.0 |
| 112 | Sep 8, 2020 | 06:35:06 | 7.773 10 | -36.981 10 | 0.3 | 3.8 |
| 113 | Sep 8, 2020 | 06:39:18 | 7.764 12 | -37.001 12 | 0.3 | 4.5 |
| 114 | Sep 8, 2020 | 07:51:54 | 7.753 06 | -37.032 06 | 0.1 | 3.8 |
| 115 | Sep 8, 2020 | 07:58:36 | 7.768 06 | -36.943 06 | 1.0 | 3.8 |
| 116 | Sep 8, 2020 | 09:16:53 | 7.765 06 | -37.007 06 | 0.1 | 3.8 |
| 117 | Sep 8, 2020 | 09:55:28 | 7.770 05 | -36.998 05 | 0.1 | 3.9 |
| 118 | Sep 8, 2020 | 13:20:55 | 7.774 04 | -37.007 04 | 0.1 | 3.8 |
| 119 | Sep 8, 2020 | 15:32:33 | 7.781 13 | -37.009 13 | 0.2 | 3.8 |
| 120 | Sep 8, 2020 | 15:35:25 | 7.766 02 | -37.006 02 | 0.1 | 4.0 |
| 121 | Sep 8, 2020 | 15:41:56 | 7.797 07 | -36.985 07 | 0.1 | 3.8 |
| 122 | Sep 8, 2020 | 18:13:35 | 7.798 08 | -37.024 08 | 0.1 | 3.8 |
| 123 | Sep 8, 2020 | 19:36:02 | 7.782 05 | -36.981 05 | 0.1 | 4.1 |
| 124 | Sep 9, 2020 | 02:30:46 | 7.765 10 | -36.975 10 | 0.1 | 3.9 |
| 125 | Sep 9, 2020 | 02:49:32 | 7.758 04 | -36.968 04 | 0.1 | 4.0 |
| 126 | Sep 9, 2020 | 02:52:23 | 7.786 02 | -36.984 02 | 1.0 | 3.8 |
| 127 | Sep 9, 2020 | 03:00:47 | 7.770 04 | -36.991 04 | 0.1 | 3.9 |
| 128 | Sep 9, 2020 | 04:59:01 | 7.777 04 | -36.958 04 | 0.1 | 3.9 |
| 129 | Sep 9, 2020 | 09:29:11 | 7.772 04 | -36.976 04 | 0.1 | 3.9 |
| 130 | Sep 9, 2020 | 15:46:39 | 7.781 06 | -36.981 06 | 0.1 | 4.0 |
| 131 | Sep 9, 2020 | 21:39:43 | 7.757 01 | -36.980 01 | 1.0 | 3.8 |
| 132 | Sep 10, 2020 | 22:26:40 | 7.775 15 | -36.975 15 | 0.3 | 4.7 |
| 133 | Sep 11, 2020 | 10:58:25 | 7.791 03 | -37.001 03 | 0.1 | 3.9 |
| 134 | Sep 13, 2020 | 00:23:41 | 7.758 12 | -37.000 12 | 1.0 | 4.0 |
| 135 | Sep 13, 2020 | 05:10:16 | 7.984 11 | -37.012 11 | 0.3 | 4.0 |
| 136 | Sep 13, 2020 | 11:52:09 | 7.713 09 | -36.959 09 | 0.2 | 3.9 |
| 137 | Sep 13, 2020 | 14:49:55 | 7.731 12 | -36.962 12 | 0.5 | 4.0 |
| 138 | Sep 14, 2020 | 03:48:45 | 7.735 07 | -37.004 07 | 0.1 | 3.8 |
| 139 | Sep 14, 2020 | 06:58:44 | 7.720 08 | -36.915 08 | 0.1 | 3.9 |
| 140 | Sep 15, 2020 | 01:34:05 | 7.759 10 | -36.970 10 | 0.3 | 3.8 |
| 141 | Sep 15, 2020 | 13:17:25 | 7.744 10 | -36.990 10 | 0.1 | 3.9 |
| 142 | Sep 15, 2020 | 19:45:30 | 7.724 08 | -36.993 08 | 1.0 | 3.9 |
| 143 | Sep 17, 2020 | 00:37:41 | 7.742 08 | -36.972 08 | 0.1 | 4.0 |
| 144 | Sep 17, 2020 | 03:00:23 | 7.755 13 | -36.968 13 | 0.3 | 5.6 |
| 145 | Sep 17, 2020 | 04:13:10 | 7.733 13 | -36.945 13 | 0.2 | 4.0 |
| 146 | Sep 17, 2020 | 05:54:16 | 7.727 08 | -36.933 08 | 0.3 | 4.1 |
| 147 | Sep 17, 2020 | 06:19:31 | 7.734 08 | -36.938 08 | 0.1 | 3.8 |
| 148 | Sep 17, 2020 | 07:32:21 | 7.760 12 | -36.919 12 | 0.4 | 3.9 |
| 149 | Sep 18, 2020 | 09:28:59 | 7.741 12 | -36.941 12 | 0.4 | 3.9 |
| 150 | Sep 18, 2020 | 20:19:59 | 7.715 10 | -36.937 10 | 0.1 | 3.8 |
| 151 | Sep 19, 2020 | 16:15:50 | 7.743 15 | -36.946 15 | 0.3 | 4.0 |

**Table S3**

**Event New Lat New Long Vertical Horizontal Epicentral**

**ID (°) (°) Displ. (km) Displ. (km) Dist. (km)**

| 2 | 7.7302 | -37.088 | 2.2384 | 1.3112 | 2.5942 |  |
| --- | --- | --- | --- | --- | --- | --- |
| 4 | 7.8362 | -37.060 | 3.9948 | 1.0836 | 4.1392 |  |
| 8 | 7.7567 | -36.991 | 2.9452 | 1.1912 | 3.1770 |  |
| 9 | 7.7702 | -37.026 | 2.2347 | 0.4731 | 2.2842 |  |
| 10 | 7.7678 | -37.021 | 3.0676 | 1.2078 | 3.2968 |  |
| 11 | 7.7619 | -36.993 | 2.4263 | 0.7320 | 2.5343 |  |
| 14 | 7.7789 | -37.019 | 2.0898 | 1.0506 | 2.3391 |  |
| 15 | 7.8274 | -36.966 | 0.8138 | 0.7129 | 1.0819 |  |
| 18 | 7.7813 | -36.975 | 4.5446 | 4.9479 | 6.7182 |  |
| 19 | 7.7670 | -36.972 | 4.0826 | 1.3563 | 4.3020 |  |
| 24 | 7.7963 | -37.006 | 2.5973 | 4.8942 | 5.5407 |  |
| 25 | 7.7837 | -36.982 | 2.6063 | 3.5030 | 4.3662 |  |
| 26 | 7.7343 | -37.025 | 1.5867 | 1.6661 | 2.3008 |  |
| 28 | 7.7721 | -37.022 | 2.4376 | 2.3980 | 3.4194 |  |
| 29 | 7.7804 | -36.904 | 3.3302 | 6.0108 | 6.8716 |  |
| 30 | 7.8768 | -36.955 | 0.3497 | 0.5868 | 0.6831 |  |
| 31 | 7.7310 | -37.074 | 3.4221 | 0.4209 | 3.4479 |  |
| 33 | 7.7991 | -37.061 | 0.0862 | 3.2455 | 3.2467 |  |
| 34 | 7.6985 | -37.088 | 3.1730 | 3.5276 | 4.7447 |  |
| 35 | 7.7910 | -37.036 | 1.2239 | 1.5775 | 1.9966 |  |
| 38 | 7.7138 | -37.023 | 4.8283 | 2.5808 | 5.4748 |  |
| 42 | 7.7298 | -37.048 | 4.3967 | 0.8479 | 4.4777 |  |
| 43 | 7.8016 | -36.931 | 2.3700 | 4.5237 | 5.1069 |  |
| 44 | 7.7995 | -36.935 | 2.1388 | 3.8187 | 4.3769 |  |
| 46 | 7.7956 | -36.990 | 1.7209 | 0.0427 | 1.7214 |  |
| 47 | 7.8045 | -36.992 | 1.6083 | 0.1974 | 1.6204 |  |
| 48 | 7.7878 | -36.966 | 3.0629 | 2.9067 | 4.2226 |  |
| 49 | 7.8175 | -36.978 | 0.2666 | 1.2709 | 1.2986 |  |
| 51 | 7.7672 | -37.027 | 0.8047 | 2.4793 | 2.6066 |  |
| 54 | 7.7794 | -36.934 | 2.1196 | 4.8310 | 5.2756 |  |
| 55 | 7.7814 | -37.024 | 4.5766 | 1.6149 | 4.8532 |  |
| 57 | 7.7825 | -37.034 | 0.2835 | 1.7153 | 1.7386 |  |
| 58 | 7.8168 | -36.985 | 0.7539 | 0.5249 | 0.9186 |  |
| 61 | 7.7912 | -36.949 | 2.3204 | 4.3491 | 4.9294 |  |
| 62 | 7.7812 | -36.984 | 0.1317 | 0.6119 | 0.6259 |  |
| 63 | 7.7988 | -37.020 | 0.1200 | 3.3532 | 3.3554 |  |
| 65 | 7.8221 | -36.886 | 1.3180 | 5.0334 | 5.2031 |  |
| 66 | 7.7820 | -37.065 | 1.3302 | 0.5228 | 1.4292 |  |
| 67 | 7.7980 | -37.034 | 1.9878 | 1.5444 | 2.5172 |  |
| 68 | 7.7875 | -37.013 | 0.2625 | 2.9942 | 3.0057 |  |
| 69 | 7.8250 | -36.962 | 0.5404 | 2.3896 | 2.4499 |  |
| 72 | 7.7753 | -37.012 | 2.7925 | 0.2414 | 2.8029 |  |
| 73 | 7.7809 | -37.023 | 1.2048 | 0.7359 | 1.4118 |  |
| 74 | 7.7705 | -37.026 | 2.2771 | 1.5012 | 2.7274 |  |
| 75 | 7.7925 | -36.960 | 2.4768 | 3.3100 | 4.1341 |  |
| 76 | 7.7613 | -37.024 | 2.3536 | 1.5254 | 2.8046 |  |
| 77 | 7.7627 | -36.979 | 0.2987 | 0.1031 | 0.3160 |  |
| 78 | 7.7920 | -36.967 | 1.3078 | 2.9403 | 3.2180 |  |
| 79 | 7.7872 | -37.012 | 0.8077 | 1.9484 | 2.1091 |  |
| 80 | 7.7540 | -37.033 | 3.7452 | 2.5187 | 4.5133 |  |
| 82 | 7.7913 | -37.020 | 2.3523 | 0.0545 | 2.3530 |  |
| 83 | 7.7469 | -37.003 | 1.8730 | 0.7973 | 2.0356 |  |
| 84 | 7.7843 | -37.022 | 1.5767 | 0.2483 | 1.5961 |  |
| 85 | 7.7692 | -37.047 | 2.1276 | 0.2740 | 2.1452 |  |
| 86 | 7.7520 | -37.068 | 1.3481 | 4.5890 | 4.7829 |  |
| 87 | 7.7625 | -37.010 | 1.3916 | 2.1757 | 2.5827 |  |
| 88 | 7.7393 | -37.043 | 3.2480 | 0.7681 | 3.3375 |  |
| 89 | 7.7851 | -37.016 | 1.6774 | 0.4277 | 1.7311 |  |
| 90 | 7.7611 | -37.015 | 2.3393 | 0.4974 | 2.3916 |  |
| 91 | 7.7551 | -37.035 | 2.7773 | 0.5656 | 2.8343 |  |
| 92 | 7.7757 | -37.021 | 1.7334 | 0.0965 | 1.7360 |  |
| 93 | 7.7798 | -37.021 | 2.1868 | 0.1327 | 2.1908 |  |
| 94 | 7.7374 | -37.047 | 3.0279 | 0.7824 | 3.1274 |  |
| 95 | 7.7571 | -37.007 | 1.8891 | 0.2927 | 1.9116 |  |
| 97 | 7.7665 | -37.050 | 1.8379 | 2.2057 | 2.8711 |  |
| 98 | 7.8233 | -36.998 | 4.7484 | 9.6939 | 10.7940 |  |
| 99 | 7.7729 | -36.952 | 2.5200 | 3.5733 | 4.3725 |  |
| 100 | 7.7969 | -36.969 | 1.8671 | 0.9609 | 2.0998 |  |
| 101 | 7.7622 | -37.033 | 3.5574 | 0.3807 | 3.5777 |  |
| 102 | 7.7859 | -37.002 | 1.7491 | 1.3014 | 2.1802 |  |
| 104 | 7.7716 | -36.926 | 2.3733 | 3.9969 | 4.6485 |  |
| 105 | 7.8213 | -36.962 | 0.1523 | 1.9675 | 1.9734 |  |
| 106 | 7.7748 | -37.019 | 1.6706 | 3.3916 | 3.7807 |  |
| 107 | 7.7580 | -36.978 | 3.0909 | 1.9563 | 3.6579 |  |
| 109 | 7.7720 | -37.021 | 1.3312 | 0.9490 | 1.6348 |  |
| 110 | 7.7697 | -37.025 | 2.1850 | 0.5734 | 2.2590 |  |
| 111 | 7.7790 | -37.012 | 1.0014 | 2.0256 | 2.2596 |  |
| 112 | 7.7743 | -37.010 | 1.5840 | 1.0836 | 1.9192 |  |
| 113 | 7.7977 | -37.009 | 3.0436 | 3.2669 | 4.4650 |  |
| 114 | 7.7540 | -36.977 | 0.6571 | 2.5006 | 2.5855 |  |
| 115 | 7.7758 | -37.037 | 2.8454 | 0.7603 | 2.9452 |  |
| 116 | 7.7879 | -36.966 | 1.9648 | 2.9174 | 3.5174 |  |
| 117 | 7.7767 | -36.991 | 1.8609 | 2.0471 | 2.7665 |  |
| 118 | 7.7857 | -36.993 | 1.7366 | 0.7154 | 1.8781 |  |
| 119 | 7.7830 | -37.004 | 0.3369 | 0.6699 | 0.7498 |  |
| 120 | 7.7832 | -37.004 | 1.4612 | 0.6286 | 1.5907 |  |
| 121 | 7.8033 | -36.981 | 0.3631 | 0.1496 | 0.3927 |  |
| 122 | 7.7948 | -37.004 | 0.5714 | 1.7741 | 1.8638 |  |
| 123 | 7.7929 | -36.992 | 1.4184 | 1.3361 | 1.9486 |  |
| 124 | 7.7724 | -36.968 | 0.2614 | 0.2705 | 0.3761 |  |
| 125 | 7.7945 | -37.003 | 3.7985 | 3.6785 | 5.2877 |  |
| 126 | 7.7964 | -36.991 | 0.7068 | 1.2510 | 1.4368 |  |
| 127 | 7.7907 | -37.003 | 2.2822 | 1.4974 | 2.7296 |  |
| 128 | 7.7744 | -36.955 | 0.6116 | 0.5230 | 0.8048 |  |
| 129 | 7.7961 | -36.999 | 2.8810 | 2.0618 | 3.5427 |  |
| 130 | 7.7894 | -36.977 | 1.0409 | 0.2984 | 1.0829 |  |
| 131 | 7.7883 | -37.007 | 3.1148 | 2.9436 | 4.2856 |  |
| 133 | 7.8096 | -37.017 | 2.1540 | 1.9359 | 2.8961 |  |
| 134 | 7.7769 | -37.007 | 1.8619 | 0.8249 | 2.0364 |  |
| 136 | 7.7497 | -36.993 | 4.3774 | 3.6119 | 5.6752 |  |
| 137 | 7.7601 | -36.997 | 3.3086 | 4.1526 | 5.3095 |  |
| 138 | 7.7604 | -37.014 | 2.2456 | 1.5405 | 2.7232 |  |
| 139 | 7.7606 | -36.951 | 4.4663 | 4.5682 | 6.3888 |  |
| 140 | 7.7812 | -36.992 | 2.3284 | 2.4698 | 3.3943 |  |
| 141 | 7.7621 | -36.986 | 2.4482 | 0.4528 | 2.4897 |  |
| 142 | 7.7541 | -37.009 | 3.7582 | 2.1307 | 4.3202 |  |
| 143 | 7.7728 | -36.991 | 3.6127 | 2.3651 | 4.3180 |  |
| 144 | 7.7458 | -36.961 | 0.4614 | 0.9940 | 1.0959 |  |
| 145 | 7.7651 | -36.968 | 3.8718 | 2.0138 | 4.3642 |  |
| 147 | 7.7654 | -36.969 | 3.9004 | 3.1851 | 5.0357 |  |
| 148 | 7.7731 | -36.945 | 1.4333 | 2.7320 | 3.0852 |  |
| 149 | 7.7569 | -36.960 | 1.8603 | 2.1741 | 2.8614 |  |
| 150 | 7.7420 | -36.961 | 3.5333 | 2.3789 | 4.2595 |  |
| 151 | 7.7703 | -36.979 | 3.3392 | 3.1645 | 4.6005 |  |
|  |  |  |  |  |  |  |
|  |  |  |  |  |  |  |
|  |  |  |  |  |  |  |
|  |  |  |  |  |  |  |
|  |  |  |  |  |  |  |
|  |  |  |  |  |  |  |
|  |  |  |  |  |  |  |
